# Supplementary material for: Selective sensing of nitric oxide by a 9,10-phenanthroquinone–pyridoxal based fluorophore
Source: Royal Society of Chemistry journal article supplement (doi:10.1039/c8pp00115d), 2018-07-21
Supplement: c8pp00115d1.pdf [file c8pp00115d1.pdf]

## Selective Sensing of nitric oxide by 9,10-phenanthroquinone-pyridoxal based fluorophore

Debjani Maiti,<sup>a</sup> Abu Saleh Musha Islam<sup>a</sup>, Mihir Sasmal<sup>a</sup> Chandraday Prodhan,<sup>b</sup> and Mohammad Ali<sup>a</sup>,

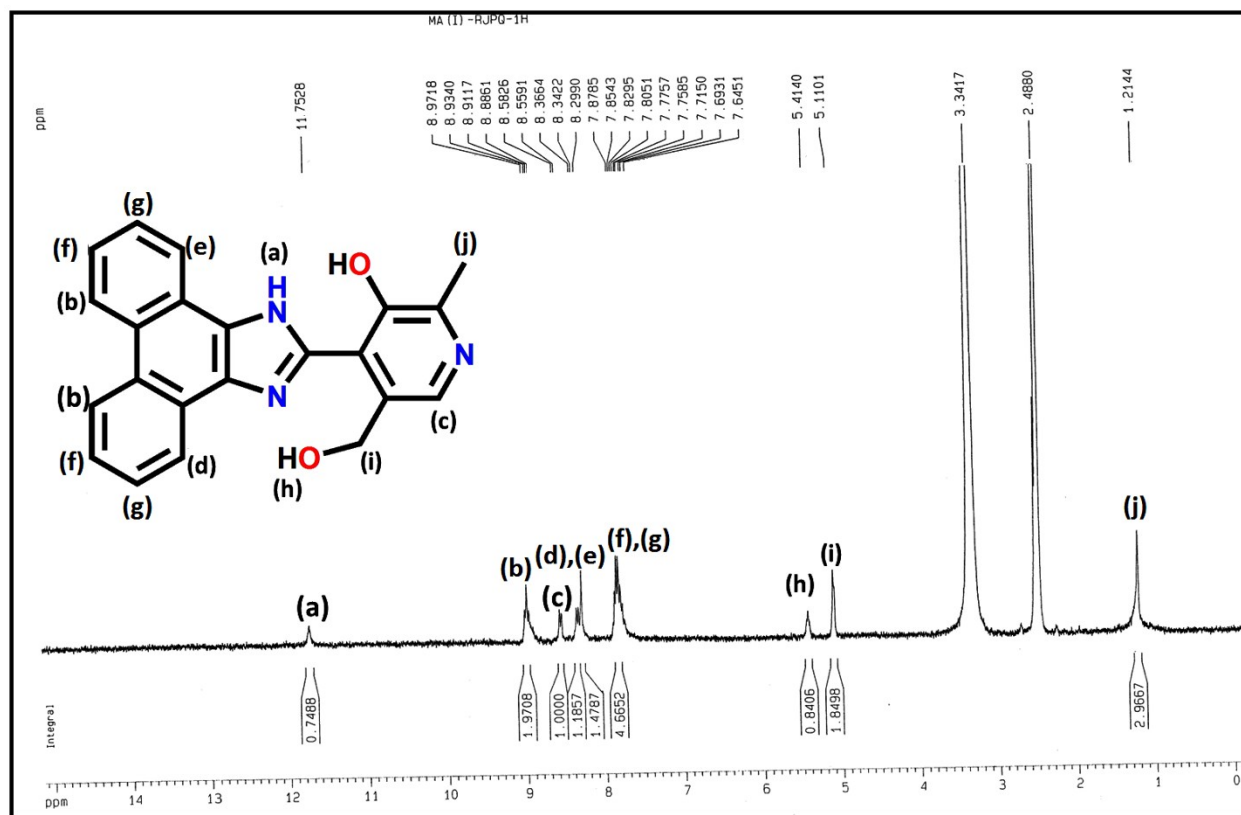

Fig.S1. <sup>1</sup>H-NMR spectrum of PQQY in DMSO-d<sub>6</sub>.

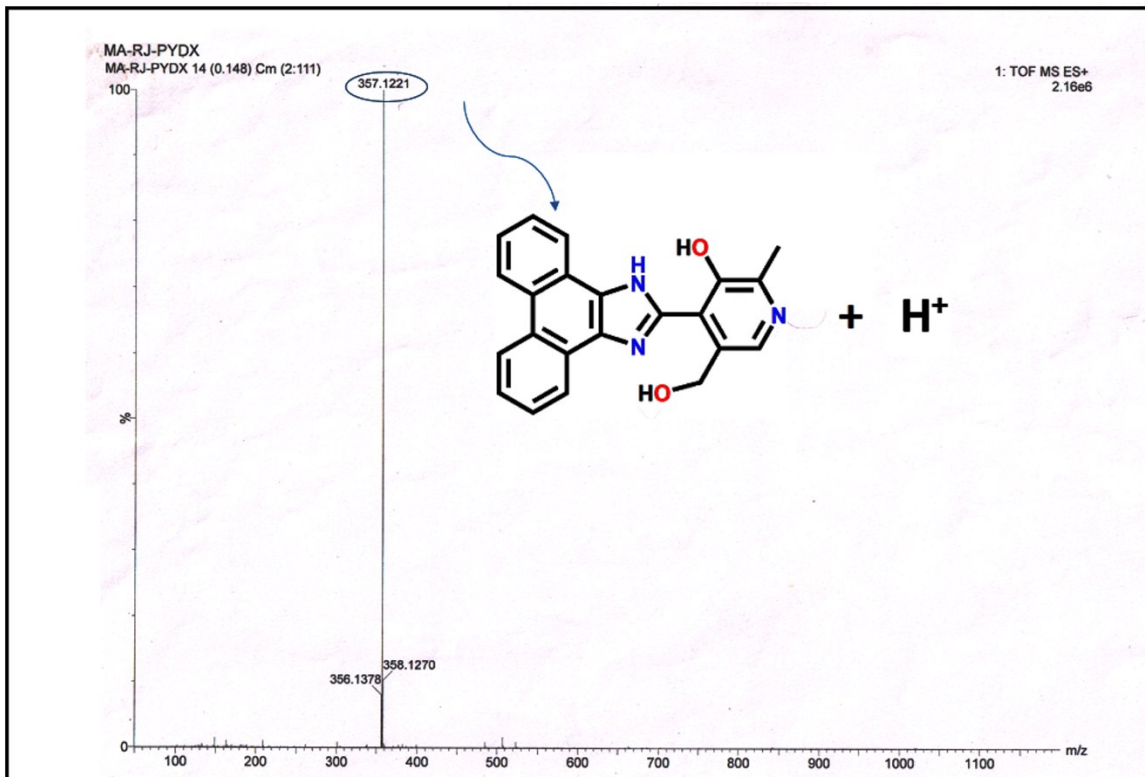

Fig.S2. Mass spectrum of PQPY in MeCN.

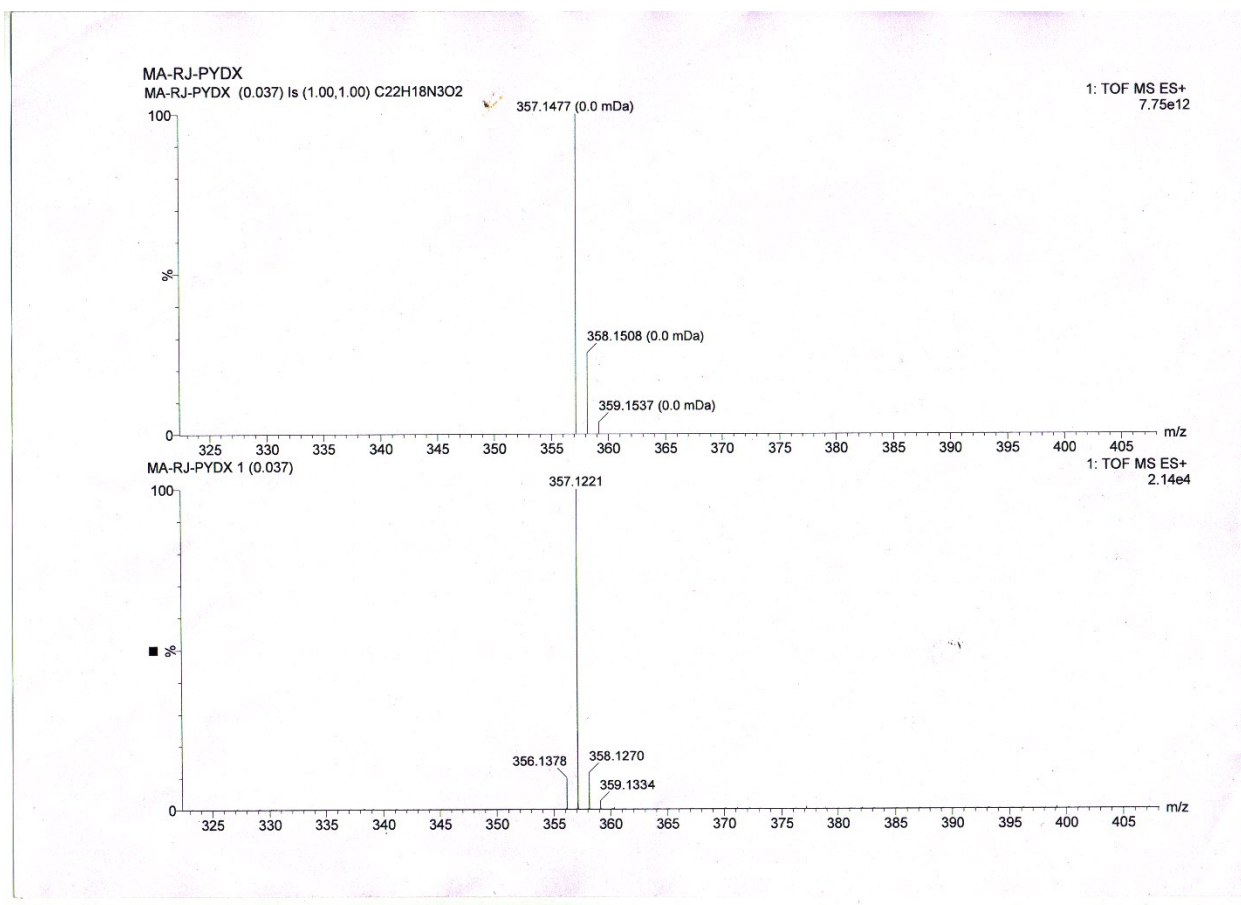

Fig.S3. Simulated mass spectrum of POPY in MeCN.

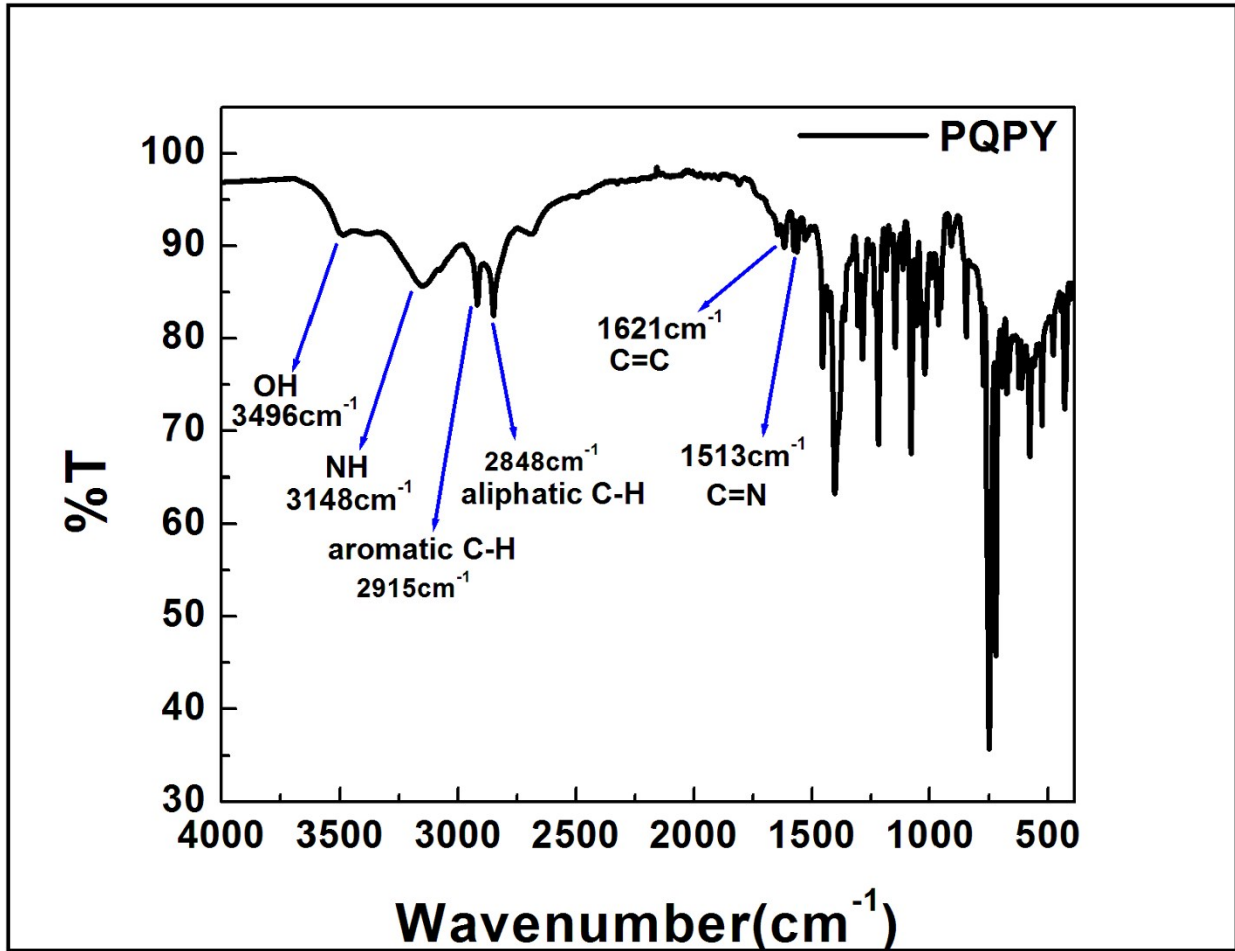

Fig.S4. IR spectrum of ligand (PQPY)

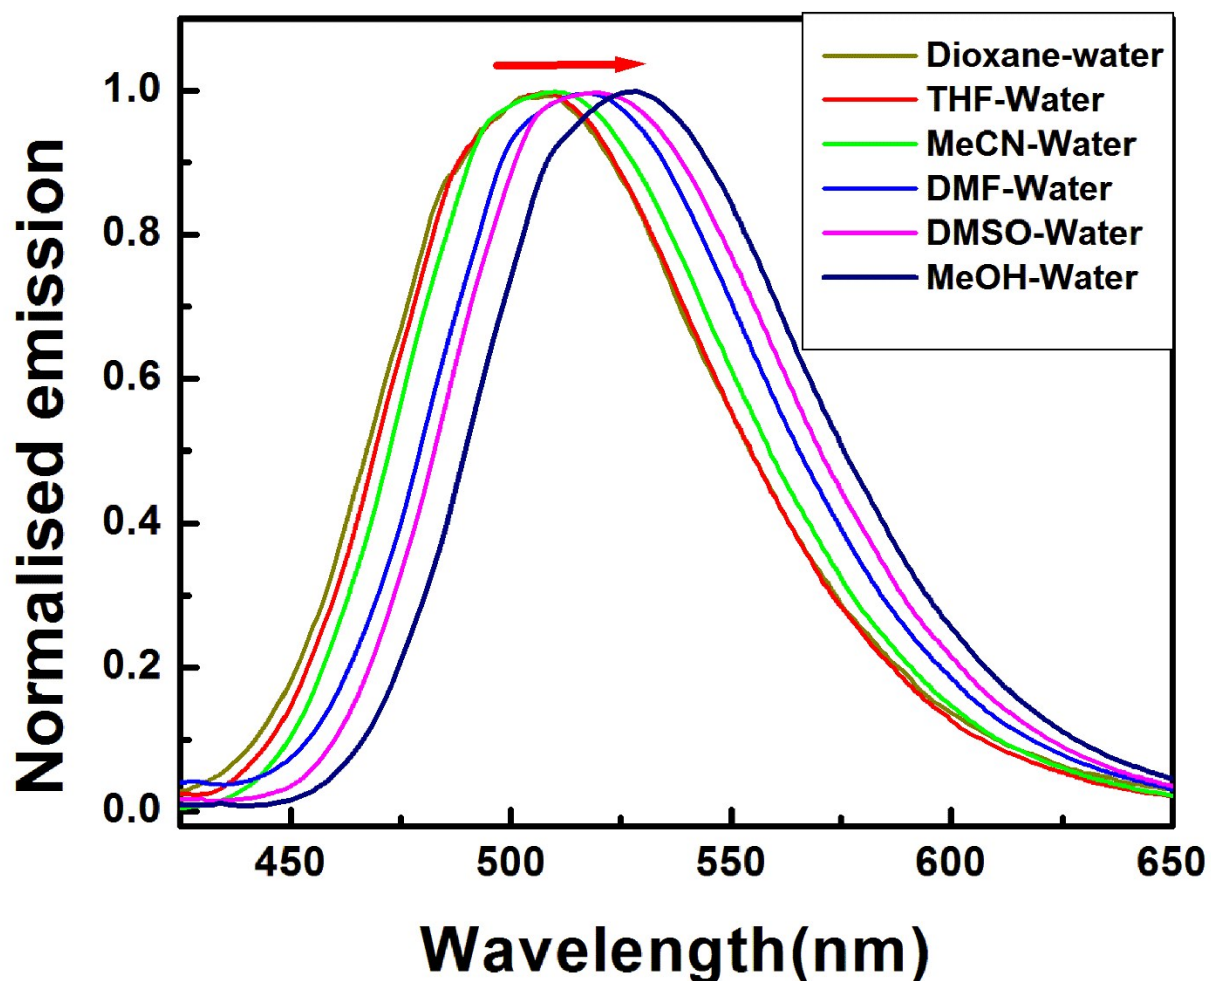

Fig.S5. Normalized emissions of probe POPY upon reaction with NO in different solvent (7:3 hepes buffer:solvent) of different polarity.

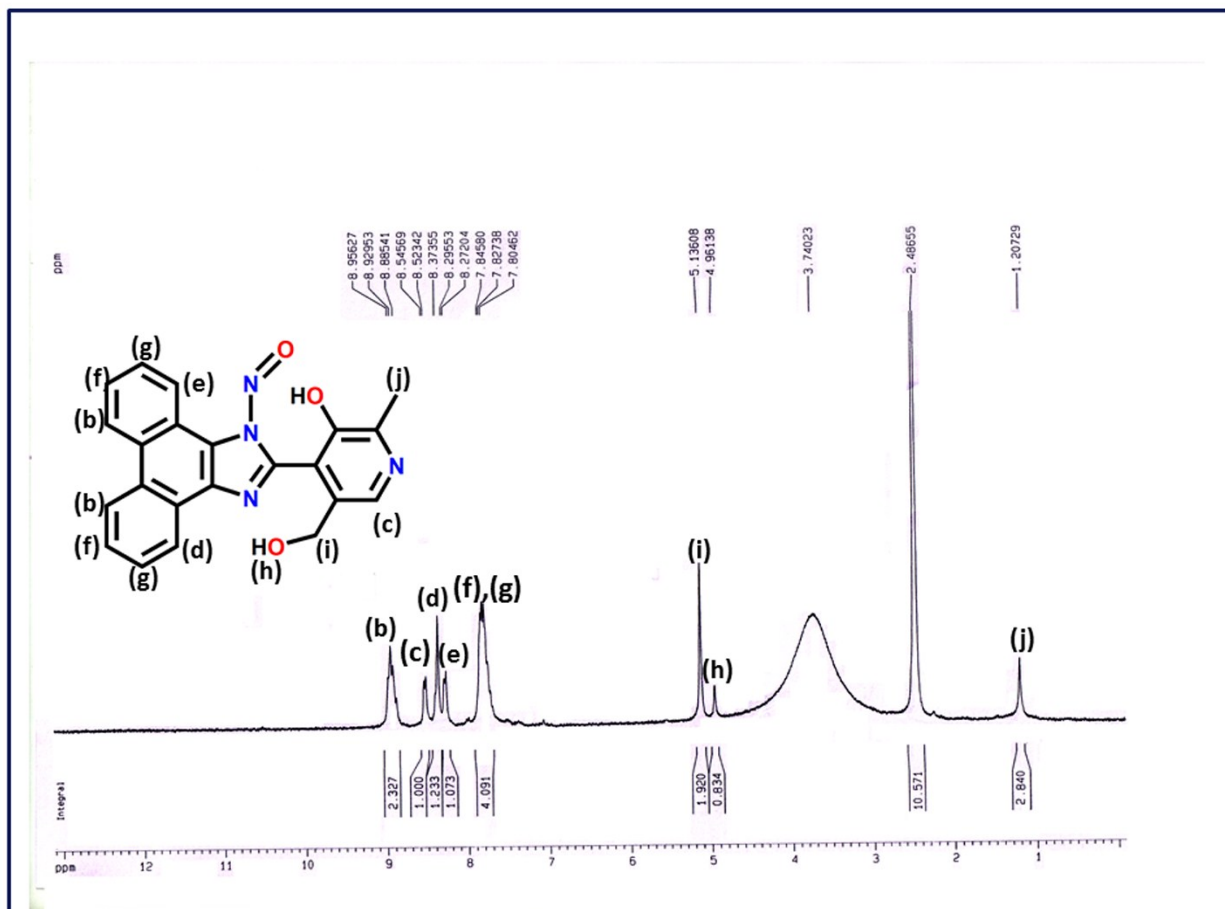

Fig.S6.  $^1\text{H-NMR}$  spectrum of POPY-NO in  $\text{DMSO-d}_6$ .

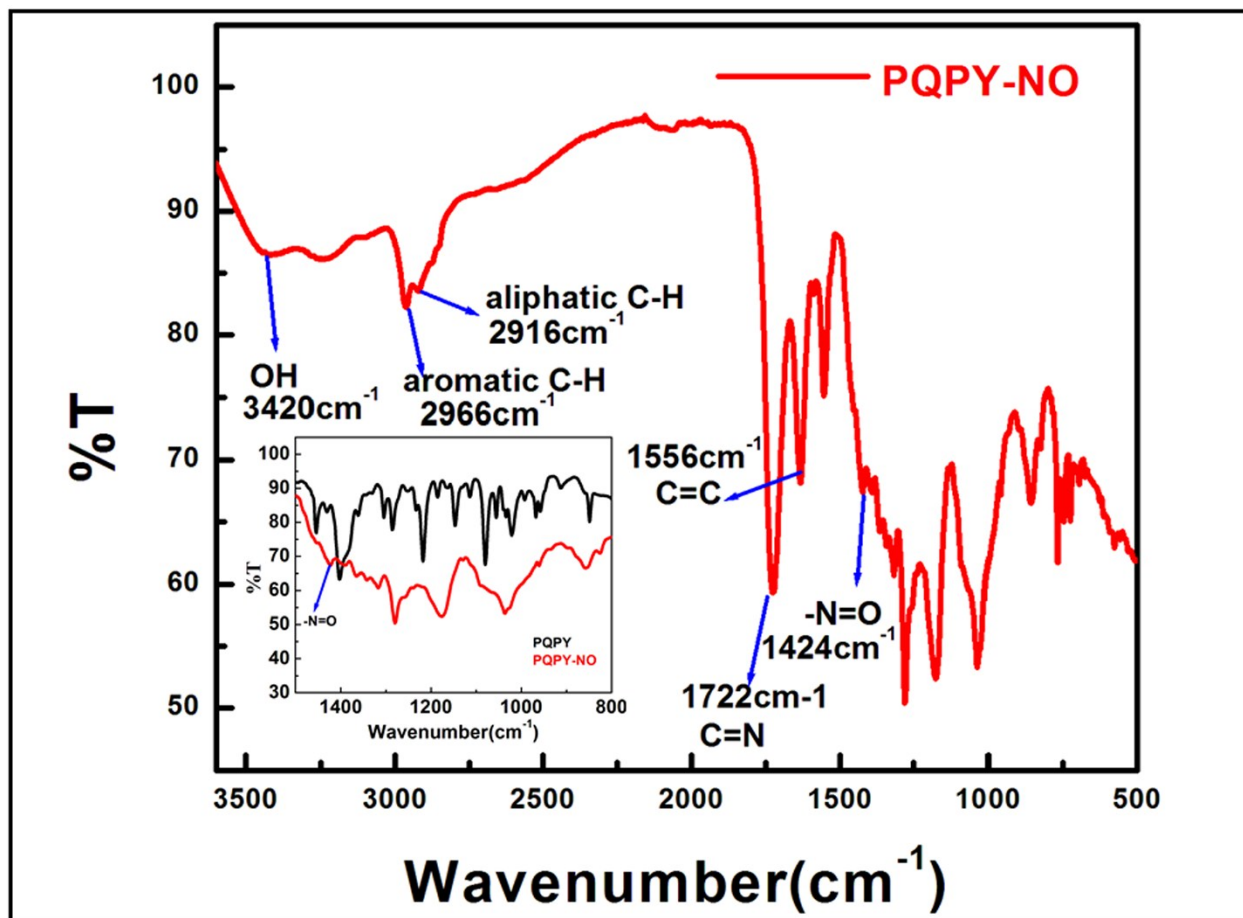

Fig.S7. IR spectrum of POPY-NO

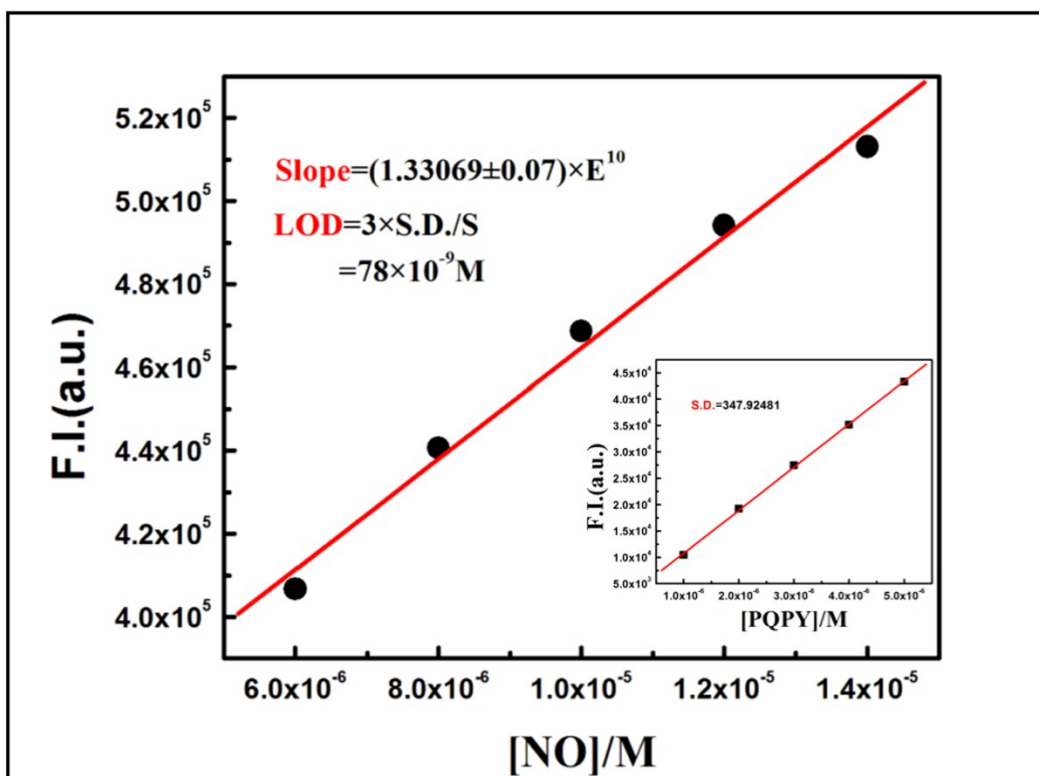

Fig.S8. Determination of LOD of PQPY+ NO.



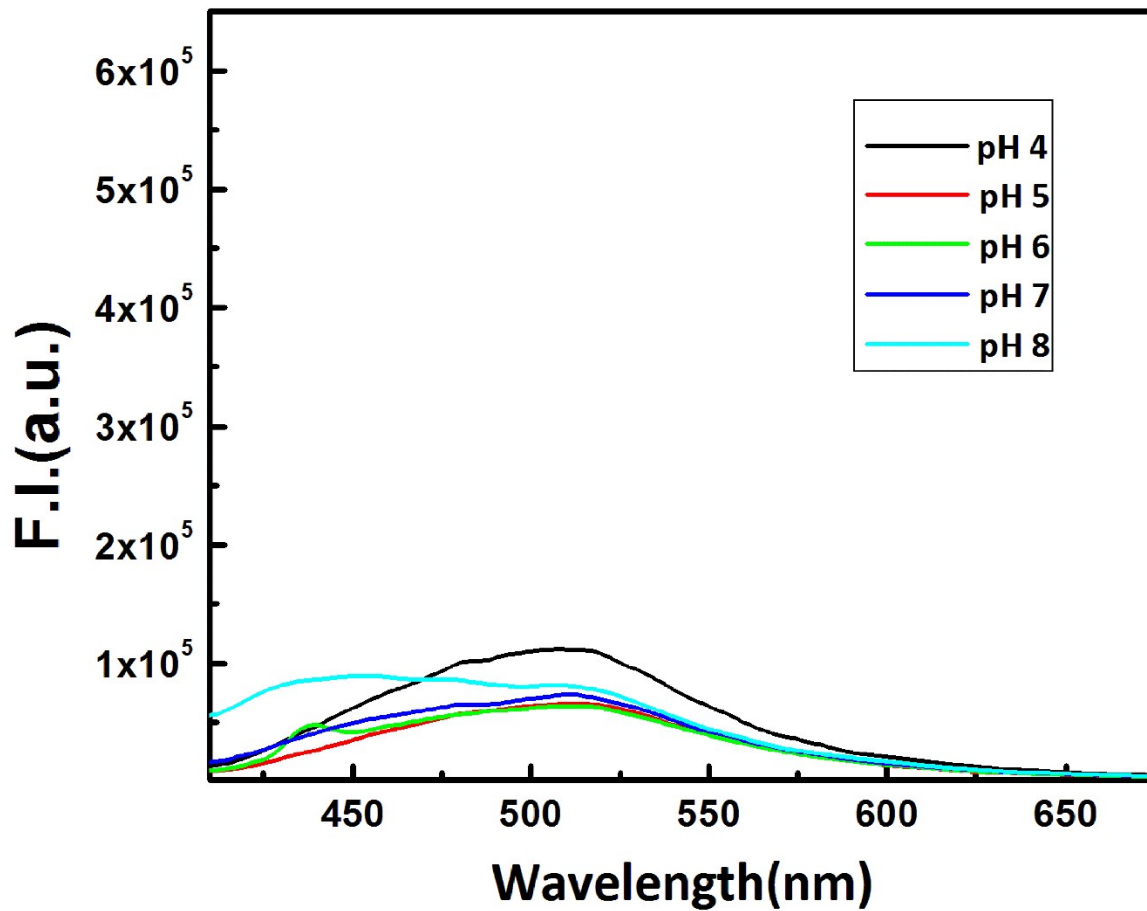

Fig.S9. Emission profile of the probe at different pH.

| Bond Lengths (Å) |        |             |        |
|------------------|--------|-------------|--------|
| N24-H26          | 1.429  | N23-C25     | 1.345  |
| C7-N24           | 1.393  | C10-C23     | 1.384  |
| C25-N24          | 1.237  | C7-C10      | 1.390  |
| Bond Angles (°)  |        |             |        |
| N24-C7-C10       | 105.49 | N24-C25-N23 | 110.36 |
| C25-N23-C10      | 105.93 | C25-N24-N26 | 122.23 |

**Table-S1** : List of some selected bond lengths of Probe (PQPY) in the ground state calculated at B3LYP Levels.

| Bond Lengths (Å) |        |             |        |
|------------------|--------|-------------|--------|
| N24-C25          | 1.429  | N23-C25     | 1.310  |
| C24-N44          | 1.393  | C10-C23     | 1.406  |
| N44-O45          | 1.237  | C7-C10      | 1.390  |
| Bond Angles (°)  |        |             |        |
| N24-C7-C10       | 103.33 | N24-N44-O45 | 117.46 |
| C25-N23-C10      | 106.67 | C25-N24-C7  | 107.19 |
| C25-N24-C44      | 114.95 |             |        |

**Table-S2** : Some selected geometrical parameters for NO product (PQPY-NO ) in the ground state calculated at B3LYP Levels.
